# Supplementary material
Source: PubMed Central journal article supplement (PMC4302885)
Supplement: supp_141.21.4121_DEV110296supp.pdf [file supp_141.21.4121_DEV110296supp.pdf]

Pelton et al

## SUPPLEMENTAL MATERIAL

## SUPPLEMENTAL FIGURES

## SuppFig 1

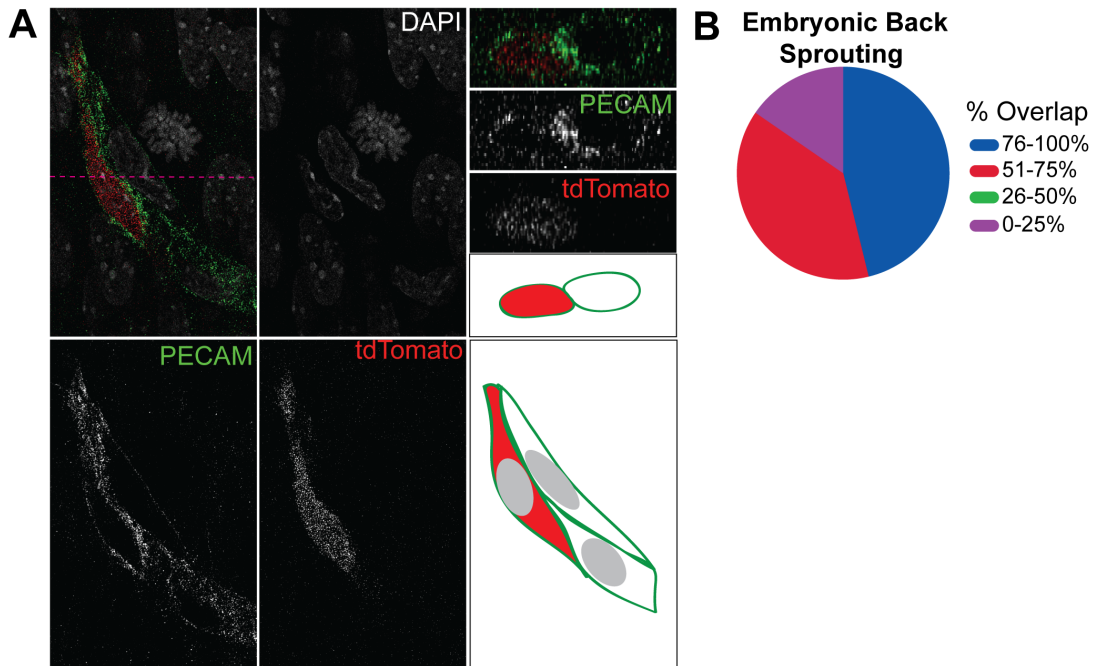**Supplemental Figure 1. Multiple Endothelial Cells Occupy the Tip of Embryonic Back Vessel**

**Sprouts.** **A)** Left, Mosaic vessel sprout from E12.5 back of *VEcad-Cre* x *tdTomato<sup>flox/+</sup>* embryo expressing vascular *tdTomato* (red), and stained with PECAM (green, endothelial marker) and DAPI (white, nuclear marker). Right, orthogonal views and diagrams show overlap of endothelial cells near the tip. **B)** Frequency of topologies with indicated percent tip cell overlap in mouse embryonic back.

Pelton et al  
SuppFig2

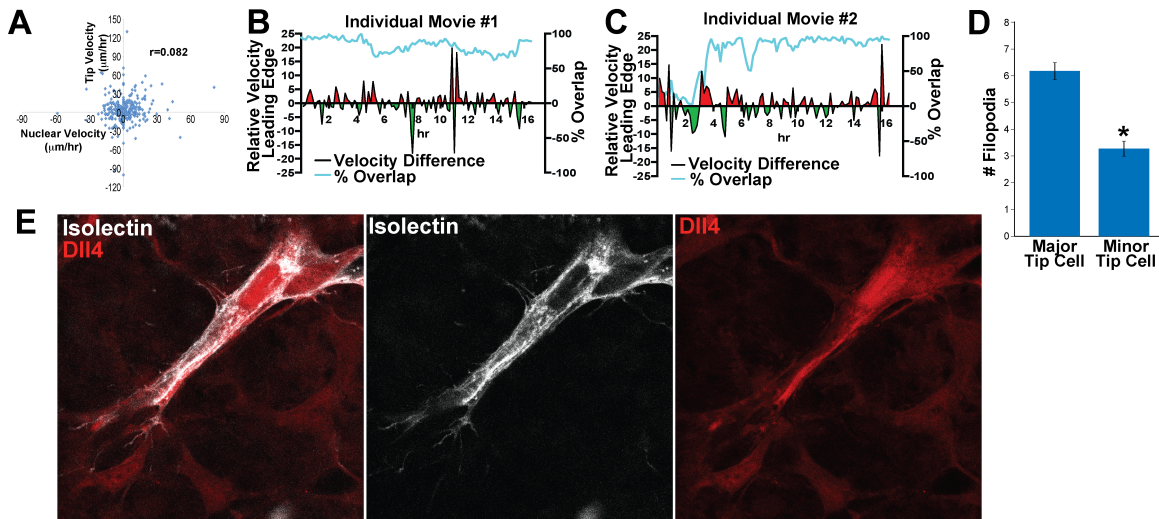

**Supplemental Figure 2. Endothelial Cell Dynamics and Notch Status at Sprout Tips. A)**

Relationship of velocities of tips of distal endothelial cells to nuclear velocities in sprouts ( $P$ = not significant). **B-C)** Graphs of two representative live-imaged sprouts, with relative velocities between two distal cells on the left and percent distal cell overlap on the right. **D)** Number of filopodia from major vs. minor tip cell in LifeAct mosaic HUVEC sprouts ( $n=117$  filopodia major;  $n=62$  filopodia minor). Statistics, Student's T-test, \*,  $p \leq 0.001$ . **E)** P6 Retinal sprout tip stained with Dll4 (red) and isolectin (white, endothelial cell marker). Right, individual channels as labeled.

Pelton et al

## Supp Fig 3

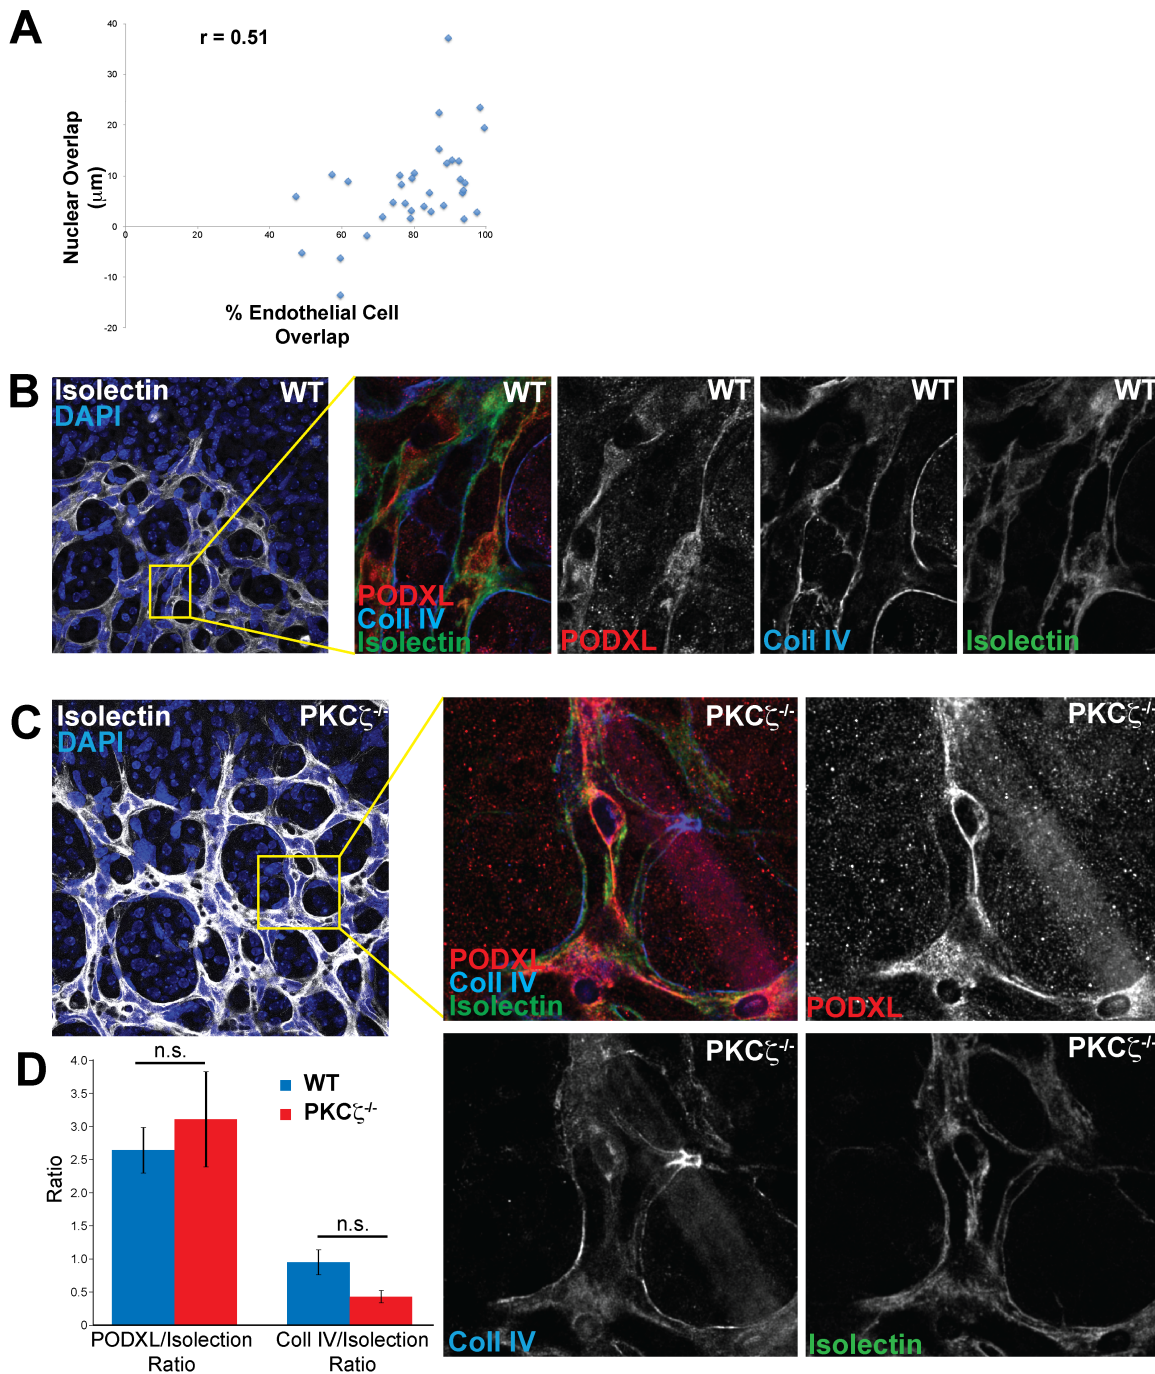**Supplemental Figure 3. Overlap Correlation and Polarity of PKC $\zeta^{-/-}$  Retinal Vessels.**

A) WT P6 mouse retinas were mosaically labeled by tdTomato expression, stained with isolectin and DAPI, then processed and measured for both tip cell overlap (as shown in Fig. 1C) and nuclear overlap. The correlation suggests that, unlike nuclear switching, nuclear overlap is a surrogate for cellular overlap. ( $P \leq 0.002$ ). **B**) WT littermate control P6 retina stained for isolectin

**Pelton et al**

(white, endothelial), and DAPI (blue, nuclear). Yellow box shows area magnified on right panels, where channels for PODXL (red, apical), Collagen IV (blue, basal), and isolectin (green, endothelial) are shown. **C**) PKC $\zeta$ <sup>-/-</sup> P6 retina stained for isolectin (white, endothelial), and DAPI (blue, nuclear). Yellow box shows area magnified on right panels, where channels for PODXL (red, apical), Collagen IV (blue, basal), and isolectin (green, endothelial) are shown. **D**) Average ratio of apical to basal pixel intensity for PODXL (n=14), collagen IV (n=12) normalized to isolectin. Statistical comparisons vs. Isolectin by Student's T-test +/- s.e.m. n.s, not significant.

Supplementary Table 1. Antibodies Used in Study

| <b>Antibody</b>    | <b>Host</b> | <b>Species</b> | <b>Source</b> | <b>Catalog Number</b> | <b>Dilution</b> |
|--------------------|-------------|----------------|---------------|-----------------------|-----------------|
| PECAM-FITC         | mouse       | human          | Invitrogen    | MHCD3101              | 1:100           |
| PODXL              | goat        | human          | R & D Systems | AF1658                | 1:100           |
| Collagen IV        | rabbit      | human          | AbD Serotec   | 2150-0140             | 1:100           |
| Dll4               | rabbit      | mouse          | Abcam         | #7280                 | 1:50            |
| $\beta$ 1 integrin | mouse       | human          | Abcam         | ab27386               | 1:100           |
| PODXL              | goat        | mouse          | R & D Systems | AF1556                | 1:50            |
| Collagen IV        | rabbit      | mouse          | AbD Serotec   | 2150-1470             | 1:200           |
| $\beta$ 1 integrin | rat         | mouse          | BD Pharmingen | #550531               | 1:50            |
| 546 Alexa Fluor    | donkey      | goat           | Invitrogen    | A-11056               | 1:200           |
| 647 Alexa Fluor    | donkey      | rabbit         | Invitrogen    | A-31573               | 1:200           |
| 594 Alexa Fluor    | donkey      | goat           | Invitrogen    | A-11058               | 1:200           |
| 546 Alexa Fluor    | donkey      | mouse          | Invitrogen    | A-10036               | 1:200           |
| 594 Alexa Fluor    | donkey      | rabbit         | Invitrogen    | A-21207               | 1:200           |
| 488 Alexa Fluor    | donkey      | rat            | Invitrogen    | A-21208               | 1:200           |
